# Supplementary material for: Highlighting the Dystonic Phenotype Related to GNAO1
Source: PubMed Central journal article supplement (PMC9545634; doi:10.1002/mds.29074), 2022-06-20
Supplement: MDS-37-1547-s004.pdf [file MDS-37-1547-s004.pdf]

| Patient     | Drug or intervention                            | Trial period & dose                                                                                                                               | Treatment outcome  |                         |            |            |            |                                | Please describe treatment effects in detail<br>If quantification of medication outcome is available (BFMDRS or other) please add it here | Side-effects (Yes/No) | Please describe treatment side-effects in detail |
|-------------|-------------------------------------------------|---------------------------------------------------------------------------------------------------------------------------------------------------|--------------------|-------------------------|------------|------------|------------|--------------------------------|------------------------------------------------------------------------------------------------------------------------------------------|-----------------------|--------------------------------------------------|
|             |                                                 |                                                                                                                                                   | Dystonia           | Extrapyramidal syndrome | Myoclonus  | Chorea     | Seizures   | Other symptom (please specify) |                                                                                                                                          |                       |                                                  |
| Patient 1-A | Levodopa                                        | 3 months<br>5mg/kg daily<br>Discontinued                                                                                                          | Minimally improved | NA                      | NA         | NA         | NA         | No changes                     | /                                                                                                                                        | No                    | /                                                |
|             | Tropatépine                                     | Time period not available<br>20 mg daily<br>Continuing                                                                                            | Minimally improved | NA                      | NA         | NA         | NA         | No changes                     | 30% improvement on dystonia                                                                                                              | No                    | /                                                |
| Patient 3-A | Levodopa                                        | Dosage not available<br>Time period not available<br>Discontinued                                                                                 | No changes         | NA                      | NA         | NA         | NA         | No changes                     | No clear response after Levodopa trial                                                                                                   | No                    | /                                                |
|             | Trihexyphenidyl                                 | Time period not available<br>4+4+3 mg daily<br>Continuing                                                                                         | Minimally improved | NA                      | NA         | NA         | NA         | No changes                     | Good response, significant worsening after an attempt of discontinuation                                                                 | No                    | /                                                |
|             | Gabapentin                                      | Time period not available<br>400+400+300 mg daily<br>Continuing                                                                                   | Minimally improved | NA                      | NA         | NA         | NA         | No changes                     | Good response 25% of improvement on BFMDRS dystonia score together with botulinum toxin injection initiation                             | No                    | /                                                |
|             | Carbamazepine                                   | Time period not available<br>Dosage not available<br>Continuing                                                                                   | No changes         | NA                      | NA         | NA         | NA         | Much improved                  | Seizure free after treatment initiation                                                                                                  | No                    | /                                                |
|             | Tetrazepam                                      | 2 months<br>5+25+25 mg daily<br>Discontinued                                                                                                      | Minimally worsened | NA                      | NA         | NA         | NA         | NA                             | Slight worsening of cervical dystonia                                                                                                    | No                    | /                                                |
|             | Botulinum Toxin-A injection (Cervical dystonia) | Continuing                                                                                                                                        | Much improved      | NA                      | NA         | NA         | NA         | NA                             | Good response after injection protocol optimization (25% improvement together with gabapentin initiation)                                | No                    | /                                                |
| Patient 4-A | Levodopa                                        | Tried several months in 2016<br>300 mg daily<br>Discontinued                                                                                      | No changes         | No changes              | NA         | NA         | NA         | NA                             | /                                                                                                                                        | Yes                   | irritability                                     |
|             | Tetrazepam                                      | 6 months;<br>12,5mgX3 per day<br>Discontinued                                                                                                     | No changes         | No changes              | NA         | NA         | NA         | NA                             | /                                                                                                                                        | No                    | /                                                |
|             | Gpi Deep Brain Stimulation                      | Duration of stimulation 5 years<br>Deep brain stimulation parameters: 1,7 V/mA 90 us 130 Hz; E1-<br>Type of device implanted Activa RC 3389 leads | Minimally worsened | NA                      | NA         | NA         | NA         | NA                             | All the adjustments needed to conclude on ineffective DBS treatment were not completed. No improvement when DBS is switched off.         | No                    | /                                                |
|             | BOTULINUM TOXIN for oromandibular dystonia      | Continuing                                                                                                                                        | Minimally improved | NA                      | NA         | NA         | NA         | NA                             | /                                                                                                                                        | No                    | /                                                |
| Patient 6-A | Levodopa                                        | 15 years<br>400 mg daily<br>Continuing                                                                                                            | Minimally improved | NA                      | NA         | NA         | NA         | NA                             | /                                                                                                                                        | No                    | /                                                |
|             | Trihexyphenidyl                                 | 15 years<br>45 mg daily<br>Continuing                                                                                                             | Minimally improved | NA                      | NA         | NA         | NA         | NA                             | /                                                                                                                                        | No                    | /                                                |
| Patient 6-B | Levodopa                                        | 6 months<br>400 mg daily<br>Discontinued                                                                                                          | No changes         | NA                      | NA         | NA         | NA         | NA                             | Subjective improvement with no clear improvement of dystonic movements                                                                   | No                    | /                                                |
| Patient 7-A | Levodopa                                        | Time period not available<br>562,5 mg days<br>Continuing                                                                                          | No changes         | No changes              | No changes | No changes | No changes | NA                             | Subjective improvement with no clear change of dystonic movements                                                                        | No                    | /                                                |
|             | Trihexyphenidyl                                 | Time period not available<br>5 mg days<br>Discontinued                                                                                            | No changes         | No changes              | No changes | No changes | No changes | NA                             | /                                                                                                                                        | No                    | /                                                |
| Patient 8-A | Trihexyphenidyl                                 | Time period not available<br>5 mg twice daily<br>Discontinued                                                                                     | No changes         | NA                      | NA         | NA         | NA         | NA                             | /                                                                                                                                        | No                    | /                                                |
|             | Gabapentin                                      | Time period not available<br>600 mg three times daily<br>Continuing                                                                               | Minimally improved | NA                      | NA         | NA         | NA         | NA                             | /                                                                                                                                        | No                    | /                                                |



|              |                            |                                                                                                                                       |                    |            |            |                    |            |            |                                                                                                                                                                                                                                                |     |                                                                                                               |
|--------------|----------------------------|---------------------------------------------------------------------------------------------------------------------------------------|--------------------|------------|------------|--------------------|------------|------------|------------------------------------------------------------------------------------------------------------------------------------------------------------------------------------------------------------------------------------------------|-----|---------------------------------------------------------------------------------------------------------------|
|              | Amantadine                 | Dosage not available<br>Discontinued                                                                                                  | No changes         | No changes | No changes | No changes         | No changes | No changes | Low dose; Short term; Agitated; no improvement                                                                                                                                                                                                 | Yes | Agitated                                                                                                      |
| Patient 15-A | Trihexyphenidyl            | 12 months<br>4mg/day<br>total: 2 mg,<br>1mg, 1mg<br><br>Continuing                                                                    | Much improved      | NA         | NA         | Much improved      | NA         | NA         | Titrated up from 1 mg nightly for 1 week to 1 mg twice a day x 2 months with marginal improvement in handwriting and diminished drooling. Titrated up to 2 mg, 1mg, 1mg with 50% reduction in amplitude and frequency of involuntary movements | Yes | Mild dry mouth, mild sleepiness                                                                               |
|              | Tetrabenazine              | 2 months<br>12.5 mg tid<br>Discontinued                                                                                               | No changes         | NA         | NA         | Minimally improved | NA         | NA         | /                                                                                                                                                                                                                                              | Yes | Sleep disturbance, daytime fatigue, lack of energy; did not improve with lowering dosage and was discontinued |
| Patient 16-A | Levodopa                   | Time period not available<br>200 mg daily<br>Discontinued                                                                             | Much improved      | No changes | No changes | No changes         | No changes | No changes | Improvement on dystonia                                                                                                                                                                                                                        | Yes | Nausea and vomiting; led to discontinuation of treatment                                                      |
| Patient 17-A | Levodopa                   | Time period not available<br>1200 mg daily<br>Continuing                                                                              | Much improved      | NA         | NA         | NA                 | NA         | NA         | Improvement in dystonia - has residual cervical dystonia                                                                                                                                                                                       | No  | None                                                                                                          |
|              | Trihexyphenidyl            | Time period not available<br>12 mg daily<br>Continuing                                                                                | Minimally improved | NA         | NA         | NA                 | NA         | NA         | Improvement in dystonia - residual cervical dystonia                                                                                                                                                                                           | No  | None                                                                                                          |
| Patient 18-A | Halopéridol                | Time period and dosage not available<br>Discontinued                                                                                  | No changes         | No changes | NA         | No changes         | NA         | NA         | /                                                                                                                                                                                                                                              | No  | /                                                                                                             |
|              | Trihexyphenidyl            | Time period and dosage not available<br>Discontinued                                                                                  | No changes         | No changes | NA         | No changes         | NA         | NA         | /                                                                                                                                                                                                                                              | No  | /                                                                                                             |
|              | Tetrabenazine              | Time period and dosage not available<br>Discontinued                                                                                  | No changes         | No changes | NA         | No changes         | NA         | NA         | /                                                                                                                                                                                                                                              | No  | /                                                                                                             |
|              | Clonidine                  | Time period and dosage not available<br>Discontinued                                                                                  | Minimally improved | No changes | NA         | No changes         | NA         | NA         | /                                                                                                                                                                                                                                              | No  | /                                                                                                             |
|              | Gpi Deep Brain Stimulation | Duration of stimulation 10 years<br>Deep brain stimulation parameters not available<br>Type of device implanted: ACTIVA RC            | Much improved      | No changes | NA         | Much improved      | NA         | NA         | Improvement of 50% on BFMDRS 2 years after surgery                                                                                                                                                                                             | No  | /                                                                                                             |
| Patient 19-B | Clonazepam                 | Time period and dosage not available<br>Discontinued                                                                                  | No changes         | NA         | NA         | NA                 | NA         | NA         | Before 2000 and follow up in the Department; no definit benefit reported but occurrence of an epileptic seizure at Clonazepam discontinuation                                                                                                  | No  | /                                                                                                             |
|              | Gpi Deep Brain Stimulation | Duration of stimulation 4 years<br>Deep brain stimulation parameters 1,4 V/mA 60 us130Hz; E1-<br>Type of device implanted; Itrell II; | Much improved      | NA         | NA         | NA                 | NA         | NA         | Since surgery was performed, there was no recurrence of painful dystonic spasms in the neck; stimulators were not replaced since 2004; she continues to be followed with a stable clinical examination.                                        | No  | /                                                                                                             |
| Patient 20-A | Trihexyphenidyl            | 20 mg/ day<br>Time period not available<br>Continuing                                                                                 | No changes         | No changes | No changes | No changes         | NA         | NA         | /                                                                                                                                                                                                                                              | No  | /                                                                                                             |
|              | Clonazepam                 | 30 days<br>Dosage not available<br>Discontinued                                                                                       | No changes         | No changes | No changes | No changes         | No changes | No changes | /                                                                                                                                                                                                                                              | No  | /                                                                                                             |
|              | Baclofen                   | 30 mg /days<br>Time period not available<br>Discontinued                                                                              | No changes         | No changes | No changes | No changes         | No changes | No changes | /                                                                                                                                                                                                                                              | No  | /                                                                                                             |

Treatment outcome was measured by the clinician using a clinical global improvement scale with 7 ranks: Very much improved, Much improved, Minimally improved, No changes, Minimally worsened, Much worsened, Very much worsened
